# Supplementary material for: A mechanistic study of cross-coupling reactions catalyzed by palladium nanoparticles supported on polyaniline nanofibers
Source: Royal Society of Chemistry journal article supplement (doi:10.1039/c4qi00130c), 2014-11-07
Supplement: c4qi00130c1.pdf [file c4qi00130c1.pdf]

*Supporting Information for*

**A Mechanistic Study of Cross-coupling Reactions Catalyzed by Palladium Nanoparticles Supported on Polyaniline Nanofibers**

*William M. Lemke, Richard B. Kaner, and Paula L. Diaconescu\**

Department of Chemistry and Biochemistry, University of California, Los Angeles, CA 90095

**Table of contents**

|                                      |     |
|--------------------------------------|-----|
| EDS and SEM.....                     | S2  |
| TEM of palladium/PANI composite..... | S3  |
| XPS of palladium/PANI composite..... | S5  |
| NMR spectroscopy.....                | S9  |
| Reaction monitoring data .....       | S19 |
| Three phase test results .....       | S23 |

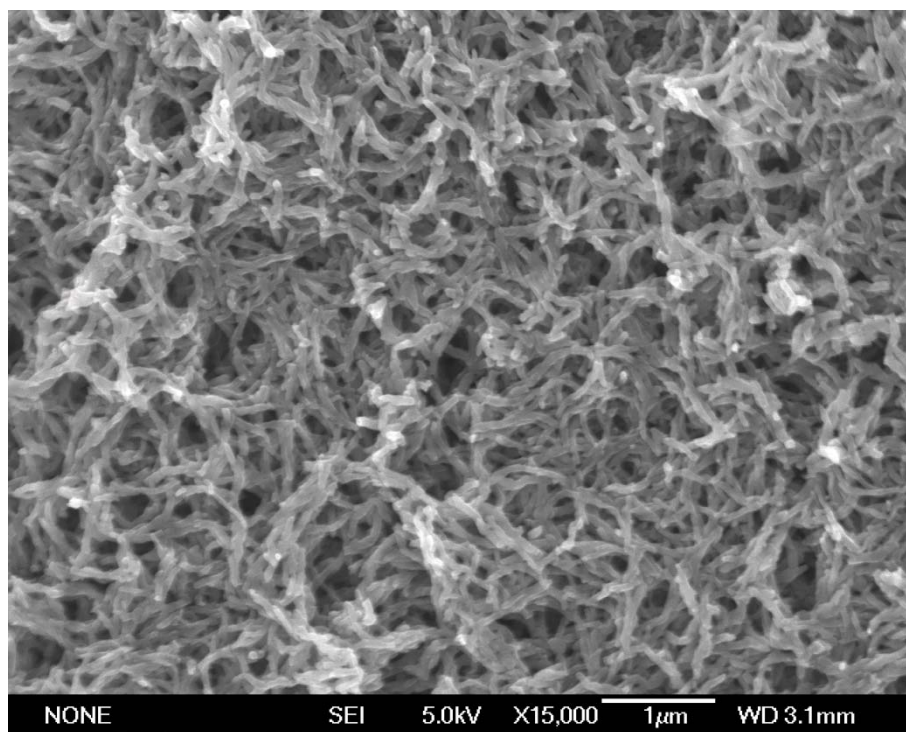

**Figure S1.** SEM of the palladium/polyaniline composite.

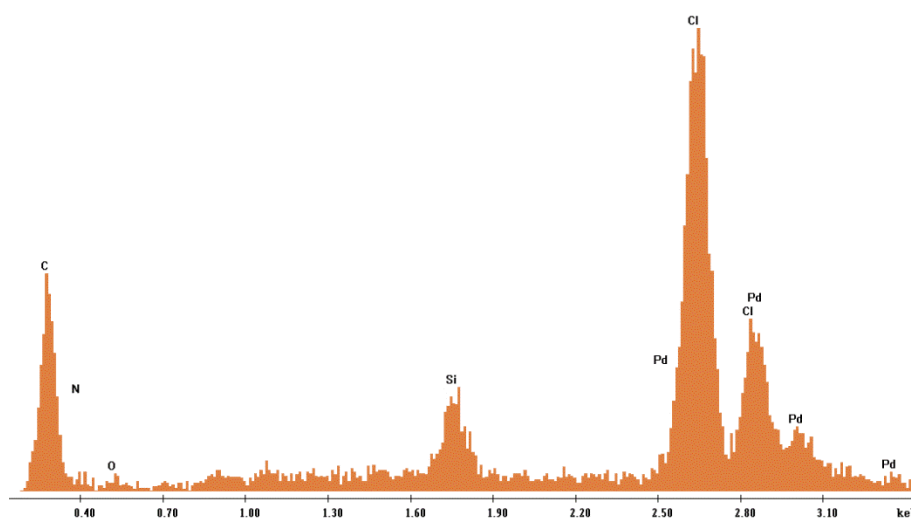

**Figure S2.** EDS of the palladium/polyaniline composite.

### Pd on PANI before reaction

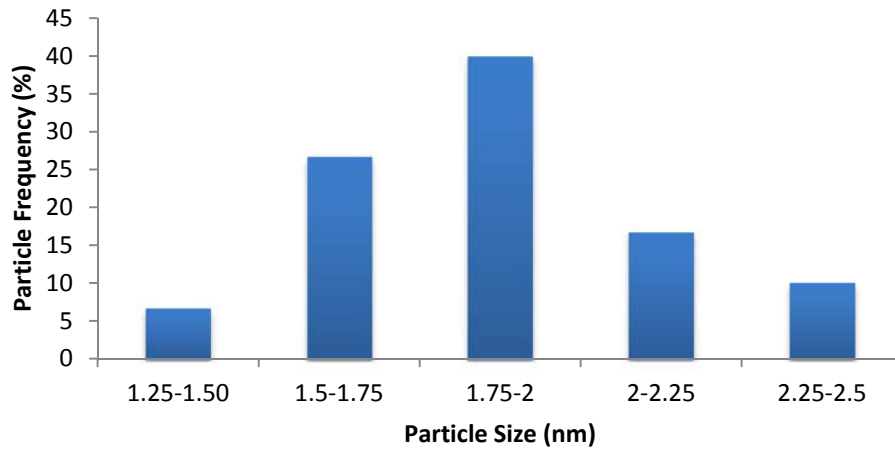

### Pd on PANI after four reactions

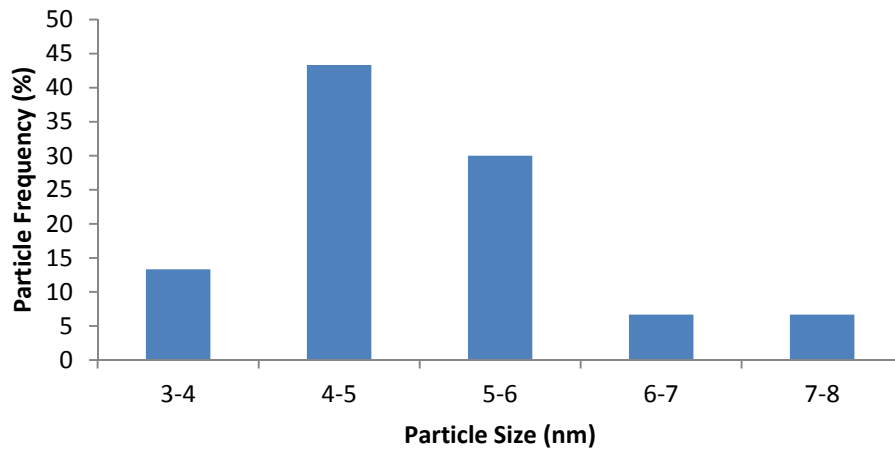

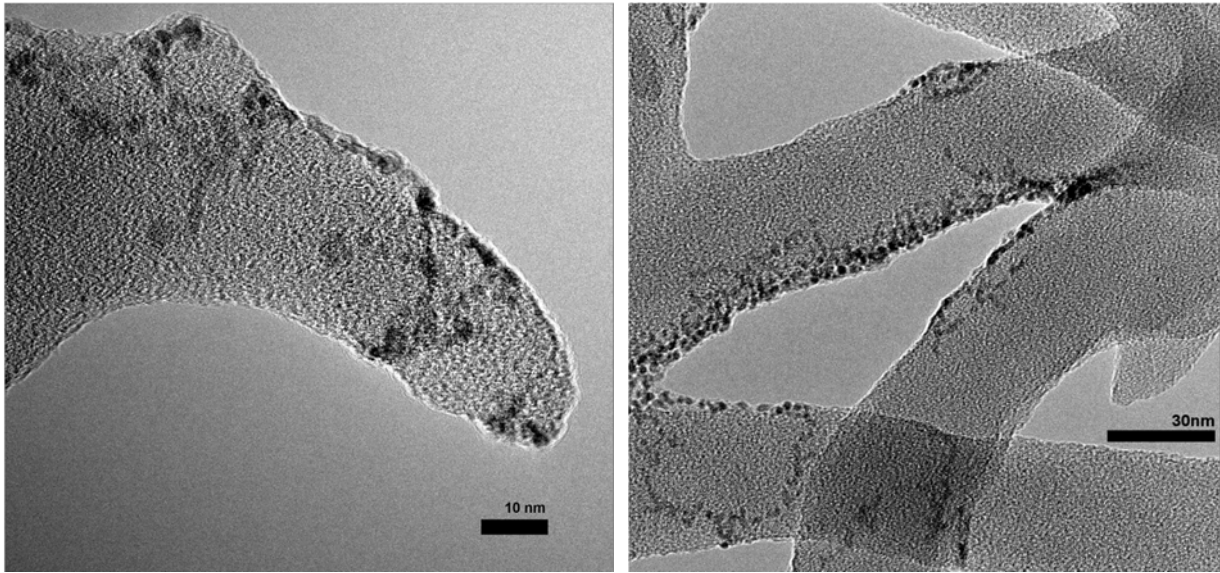

**Figure S3.** TEM of two month old Pd/PANI.

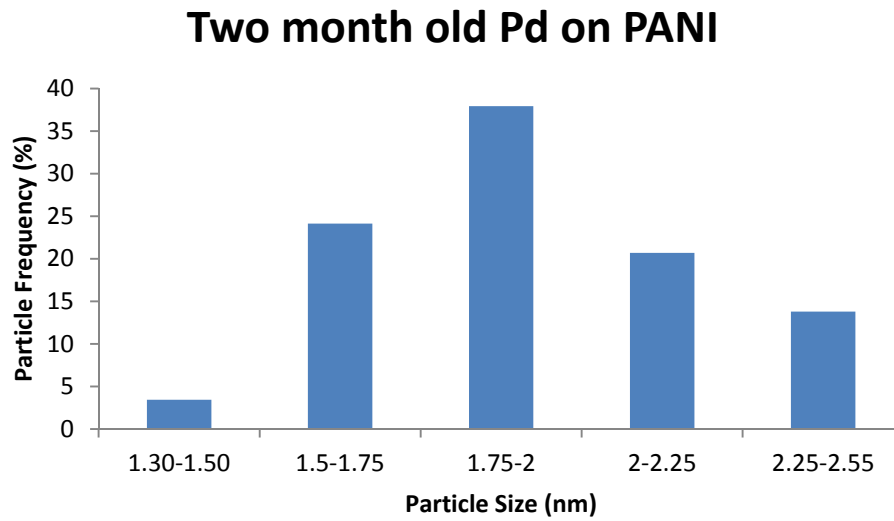

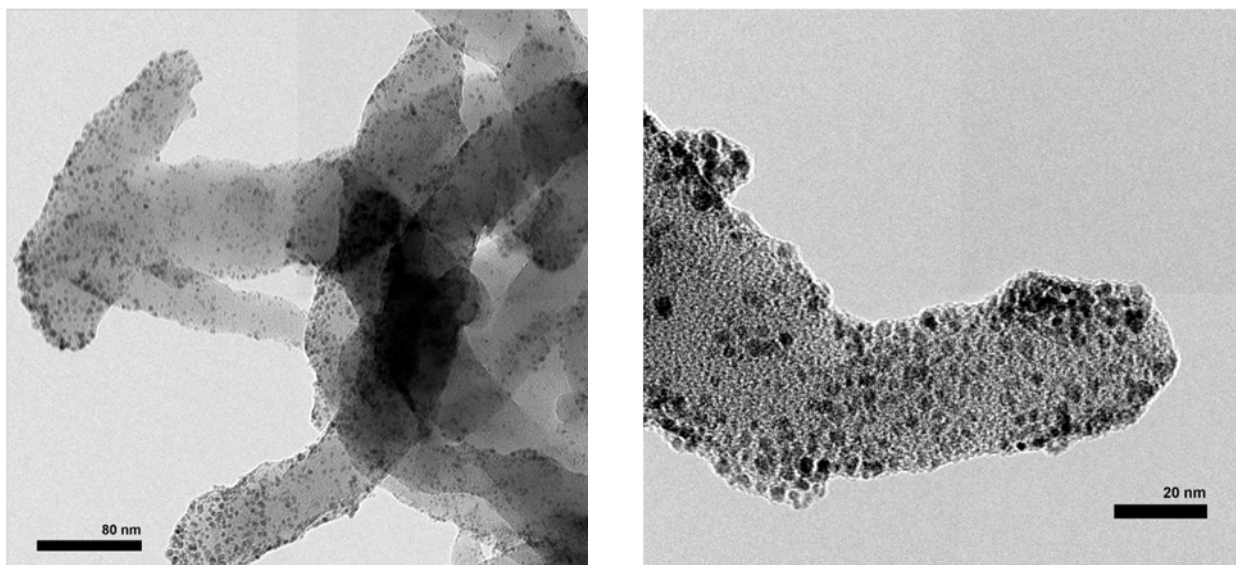

**Figure S4.** TEM after the first attempt at recycling.

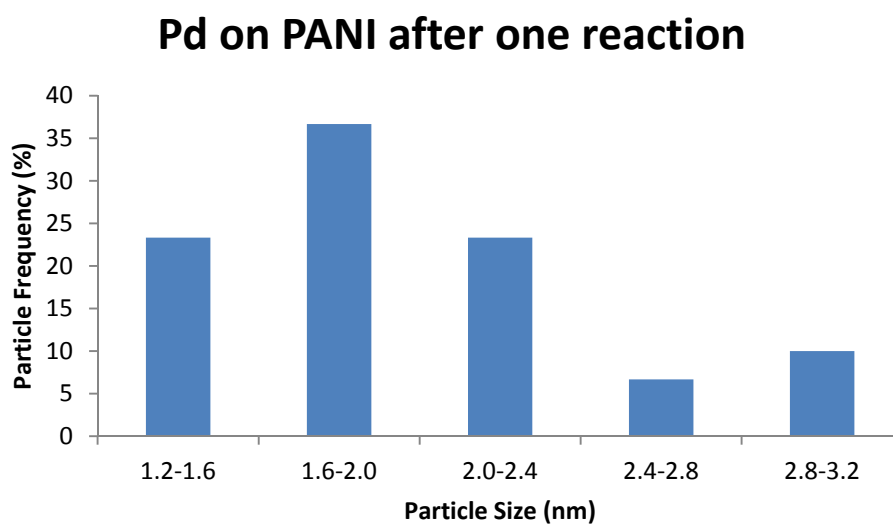

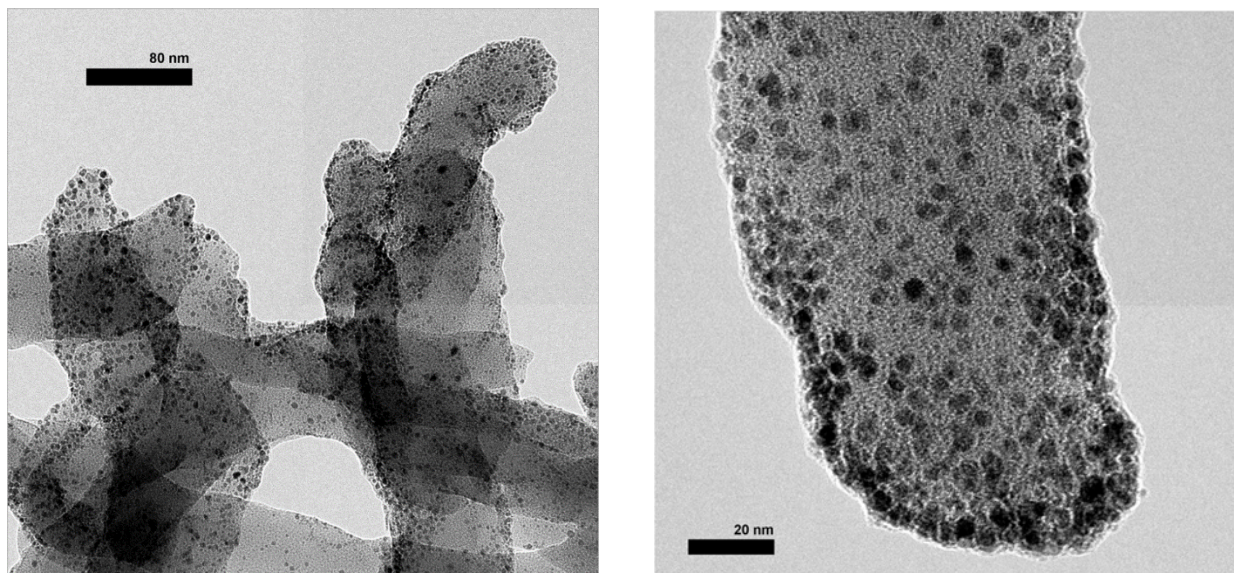

**Figure S5.** TEM after the second attempt at recycling.

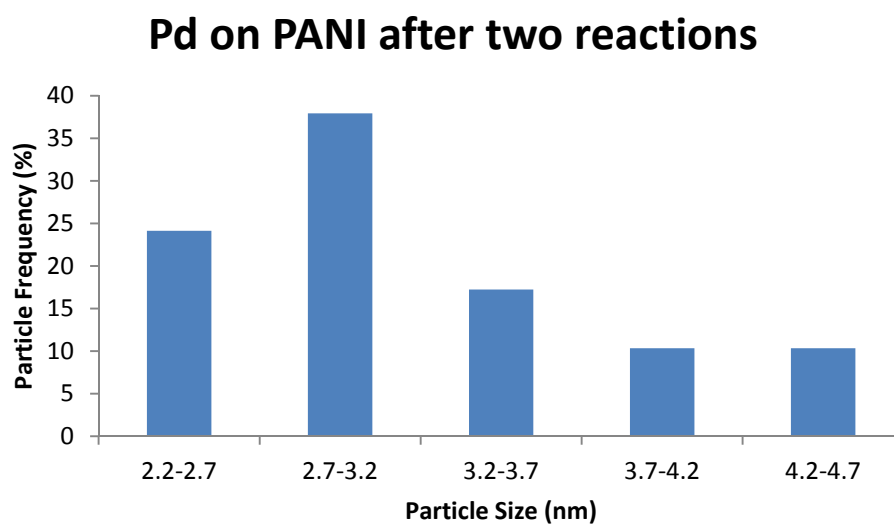

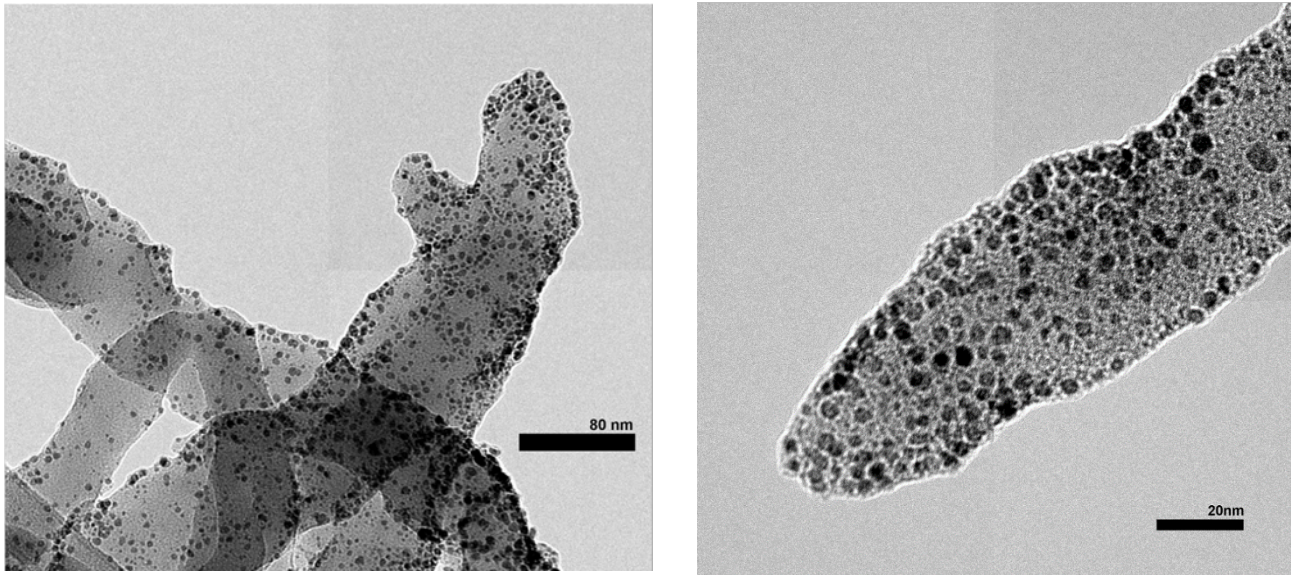

**Figure S6.** TEM after the third attempt at recycling.

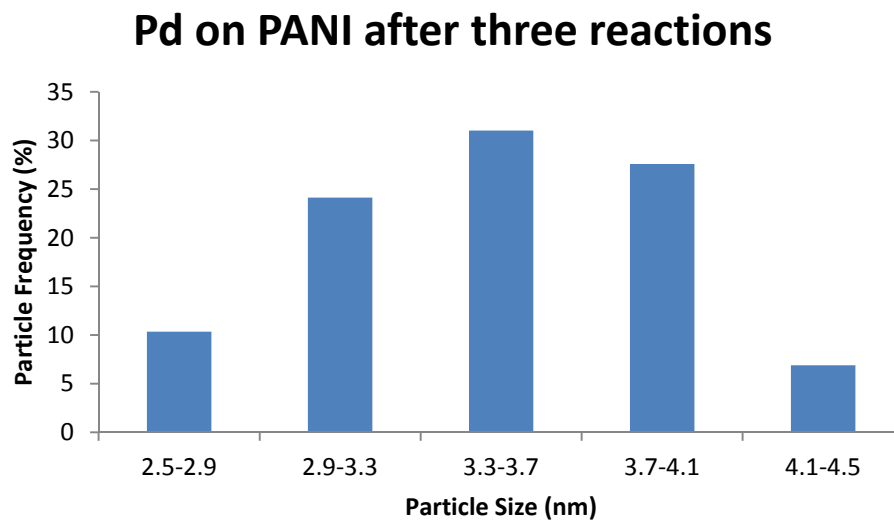

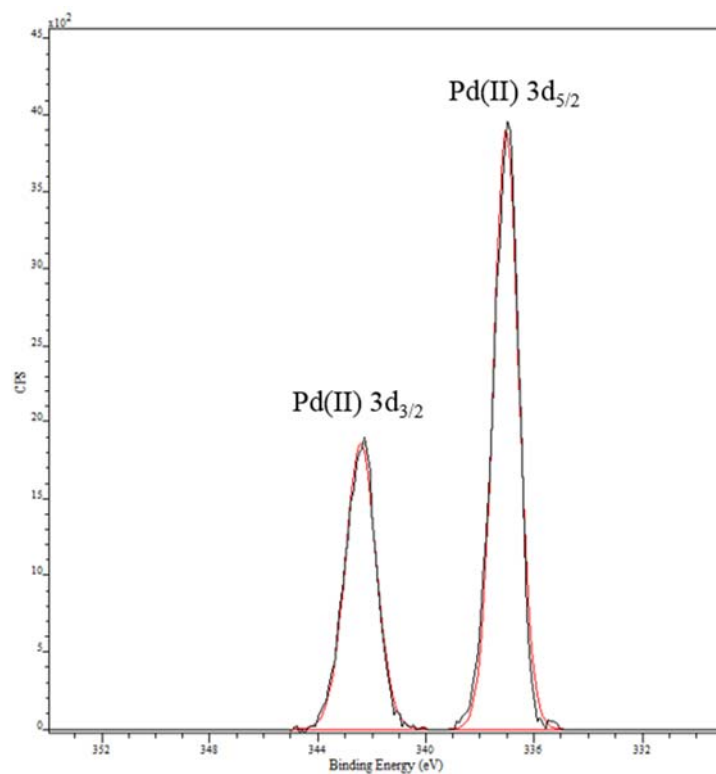

**Figure S7.** XPS of Pd/PANI after 30 min.

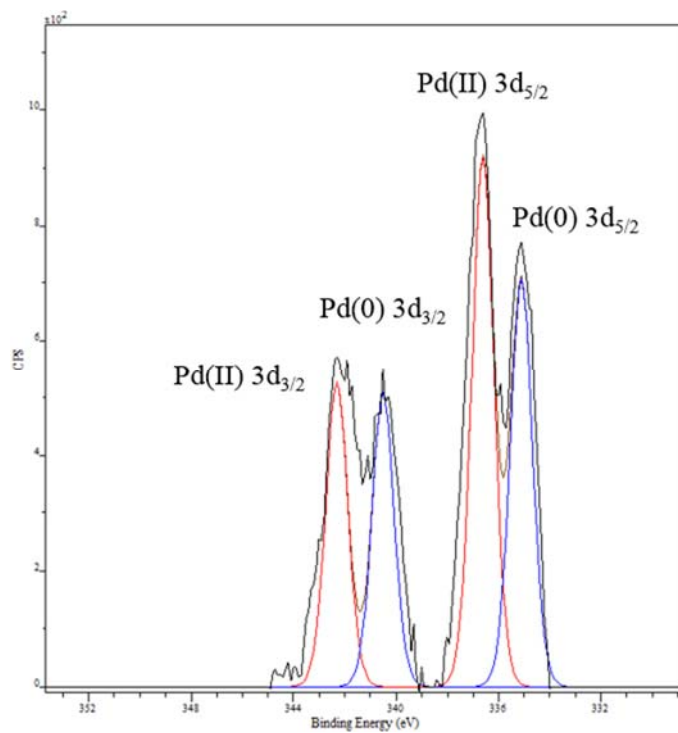

**Figure S8.** XPS of Pd/PANI after the first attempt at recycling.



## NMR spectra

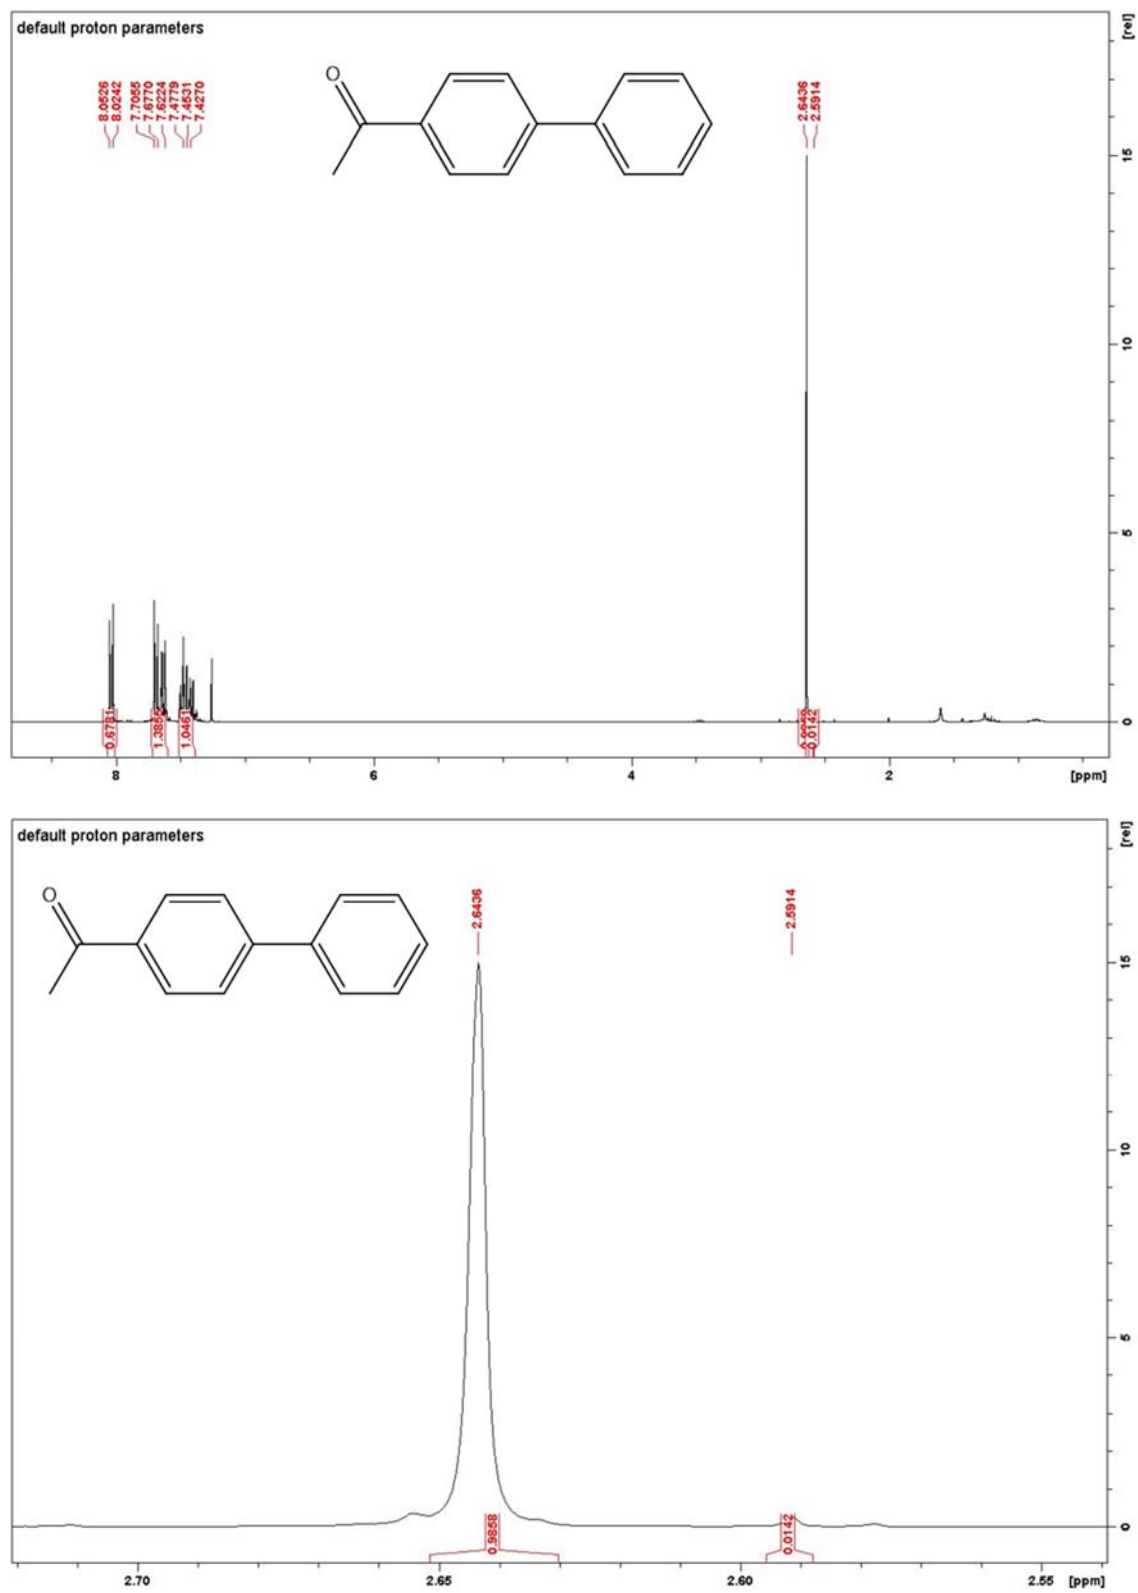

**Figure S9.** <sup>1</sup>H NMR spectra (300 MHz, CDCl<sub>3</sub>) for the conversion of *p*-chloroacetophenone.

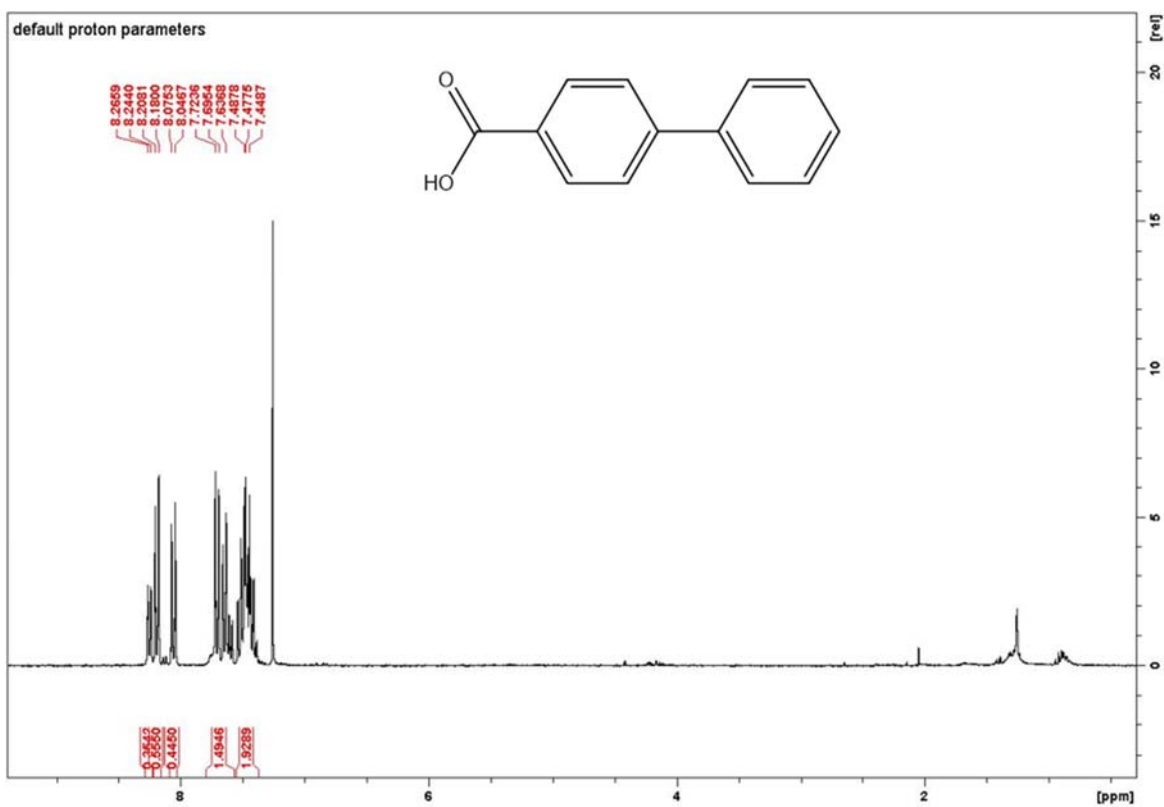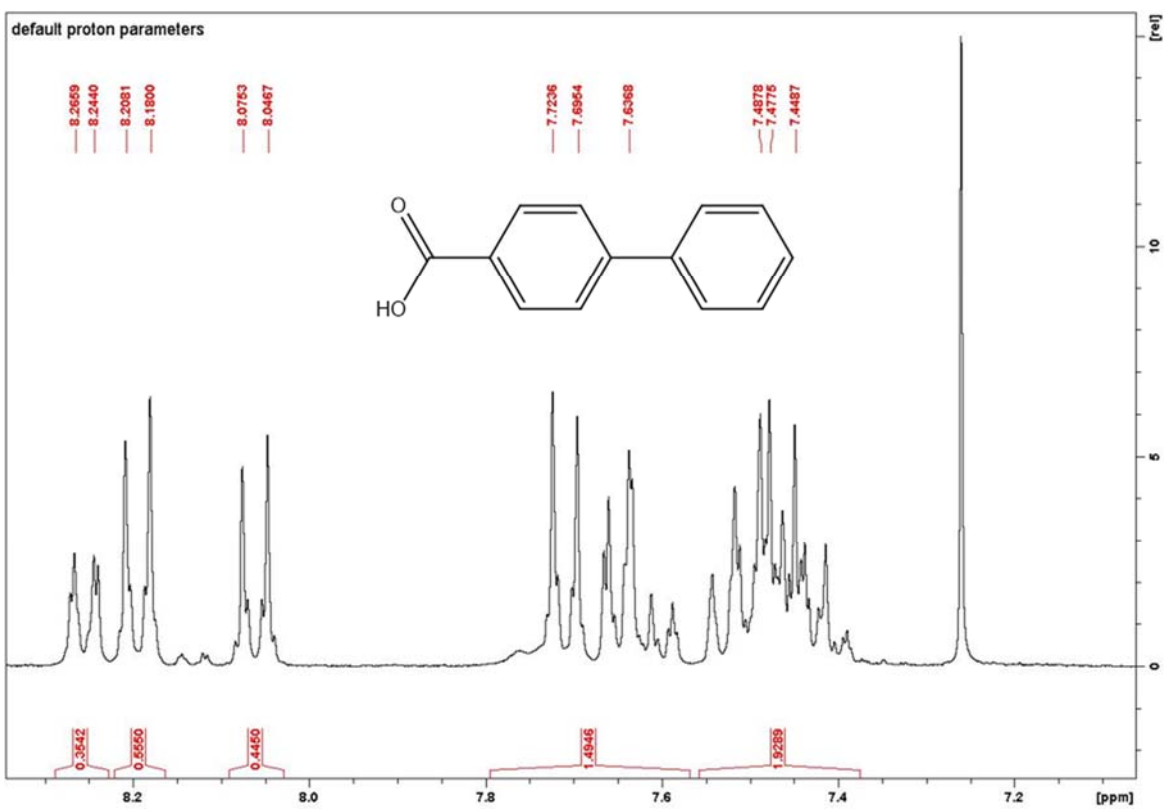

**Figure S10.**  $^1\text{H}$  NMR spectra (300 MHz,  $\text{CDCl}_3$ ) for the conversion of *p*-chlorobenzoic acid.

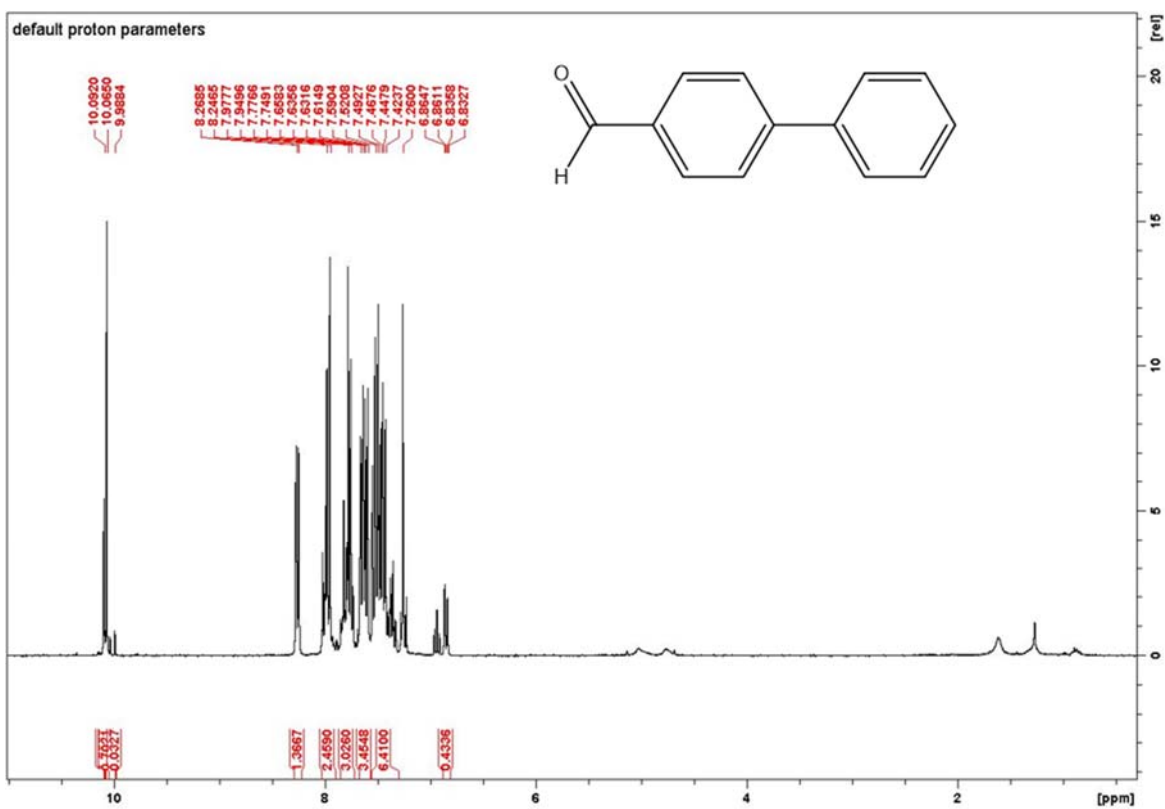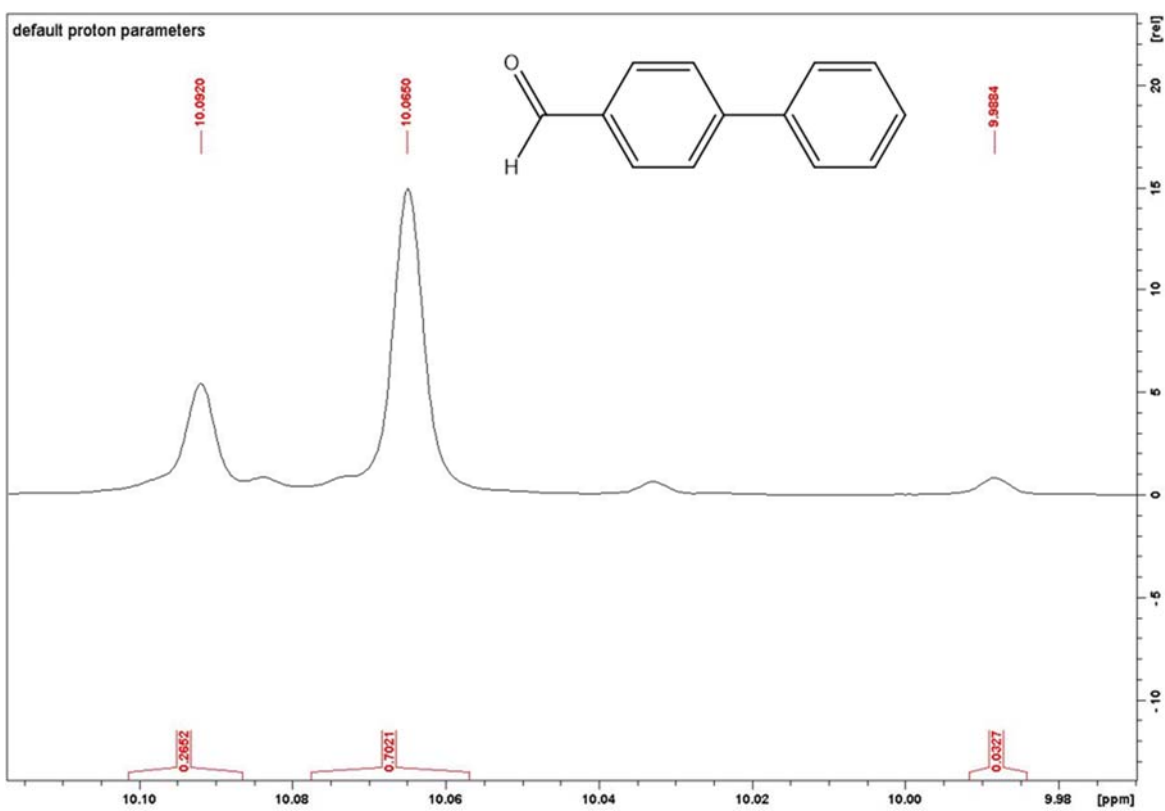

Figure S11.  $^1\text{H}$  NMR spectra (300 MHz,  $\text{CDCl}_3$ ) for the conversion of *p*-chlorobenzaldehyde.

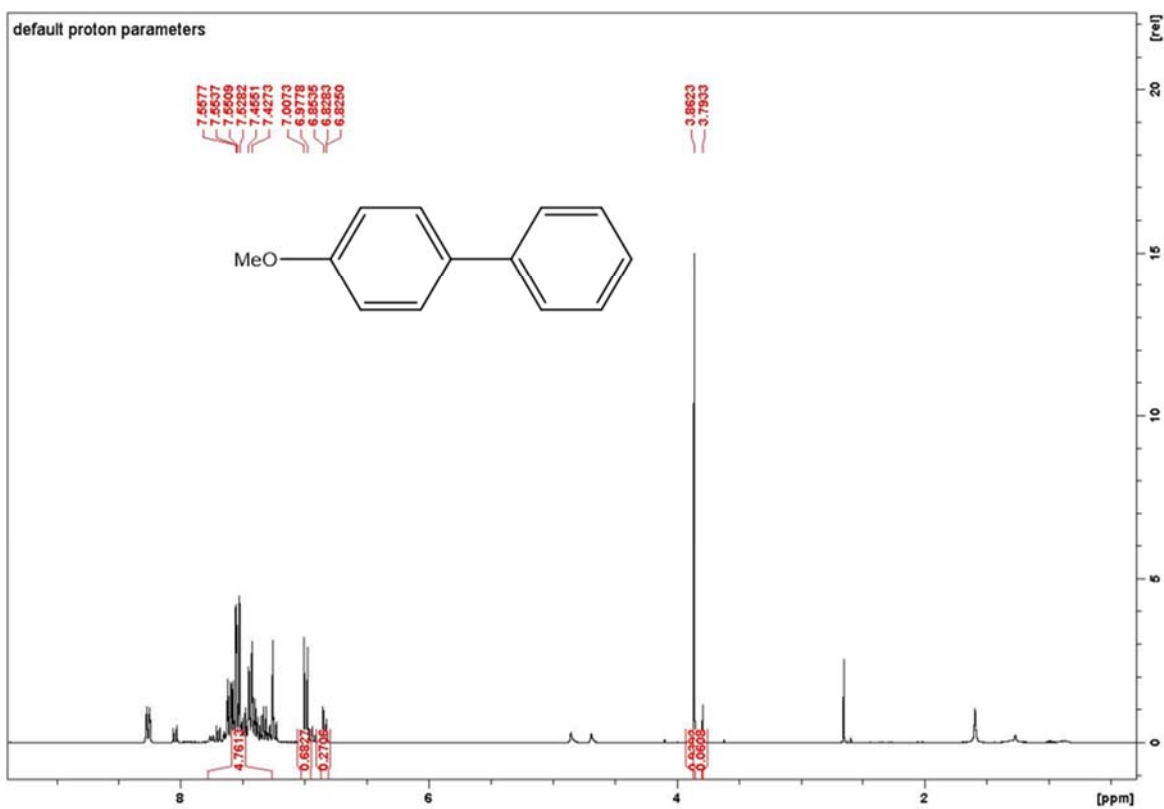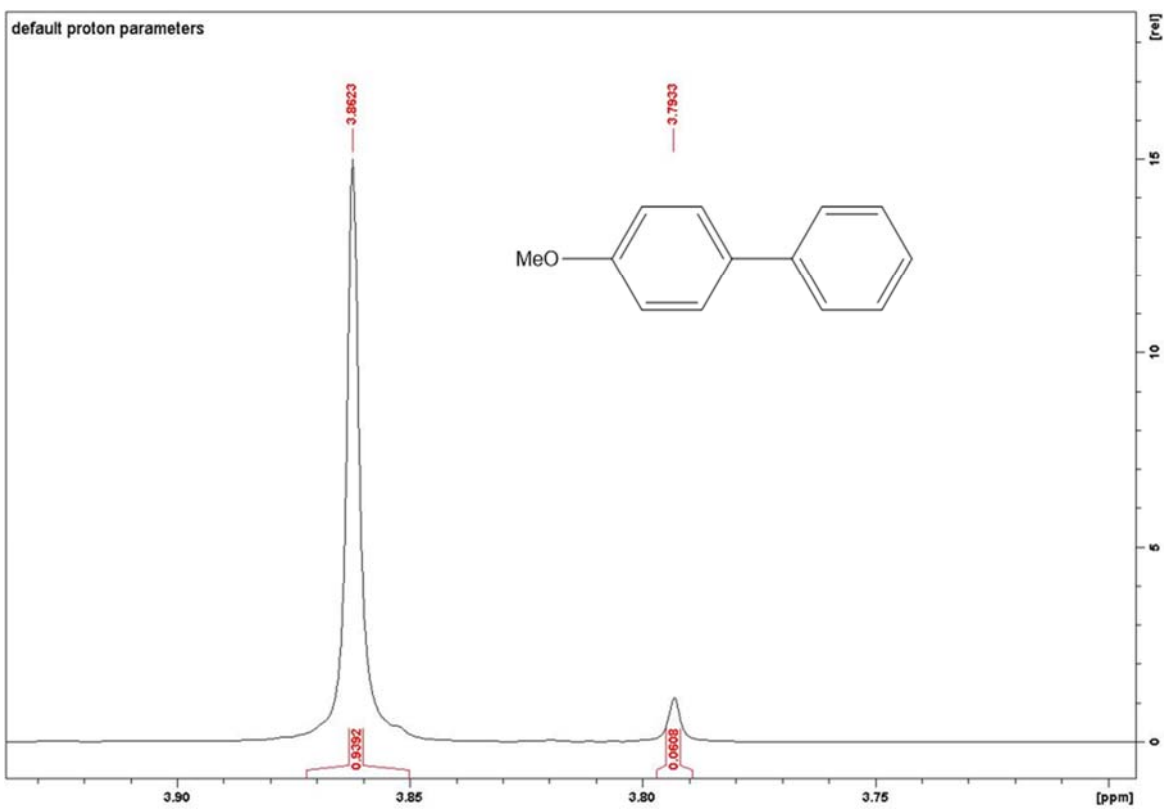

Figure S12.  $^1\text{H}$  NMR spectra (300 MHz,  $\text{CDCl}_3$ ) for the conversion of *p*-chloroanisole.

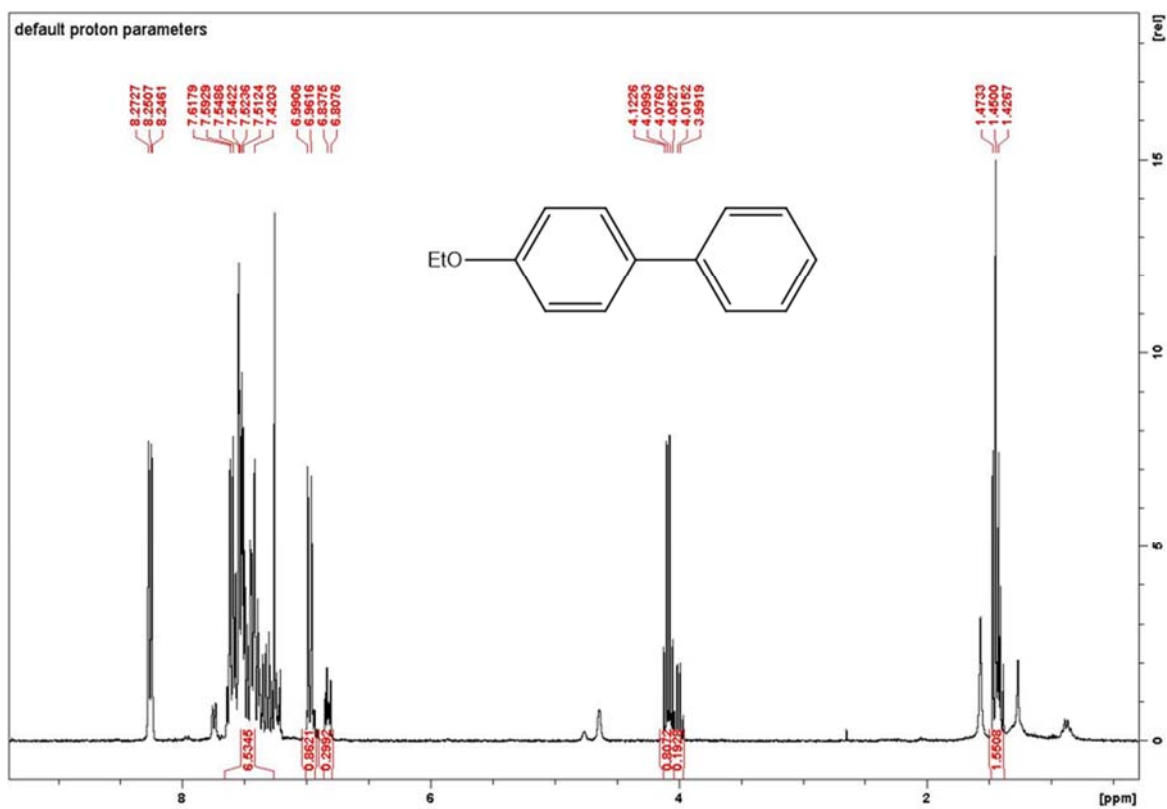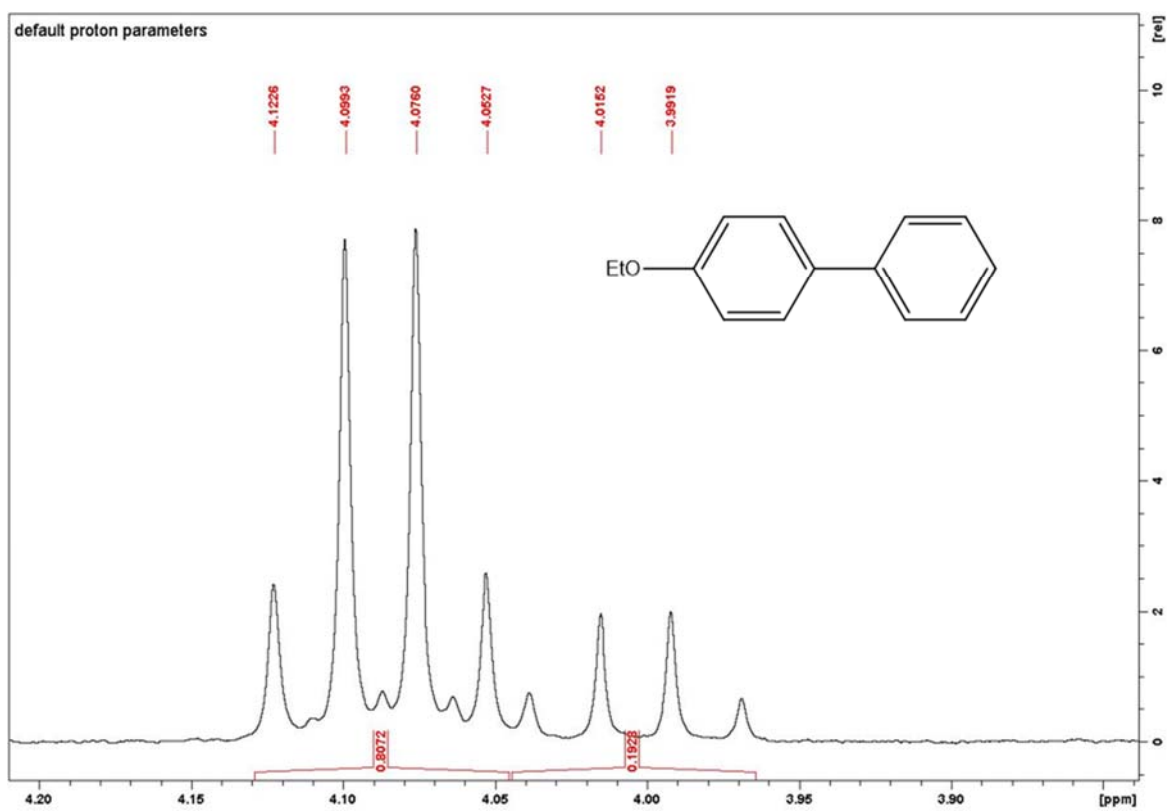

Figure S13.  $^1\text{H}$  NMR spectra (300 MHz,  $\text{CDCl}_3$ ) for the conversion of *p*-chloroethoxybenzene.

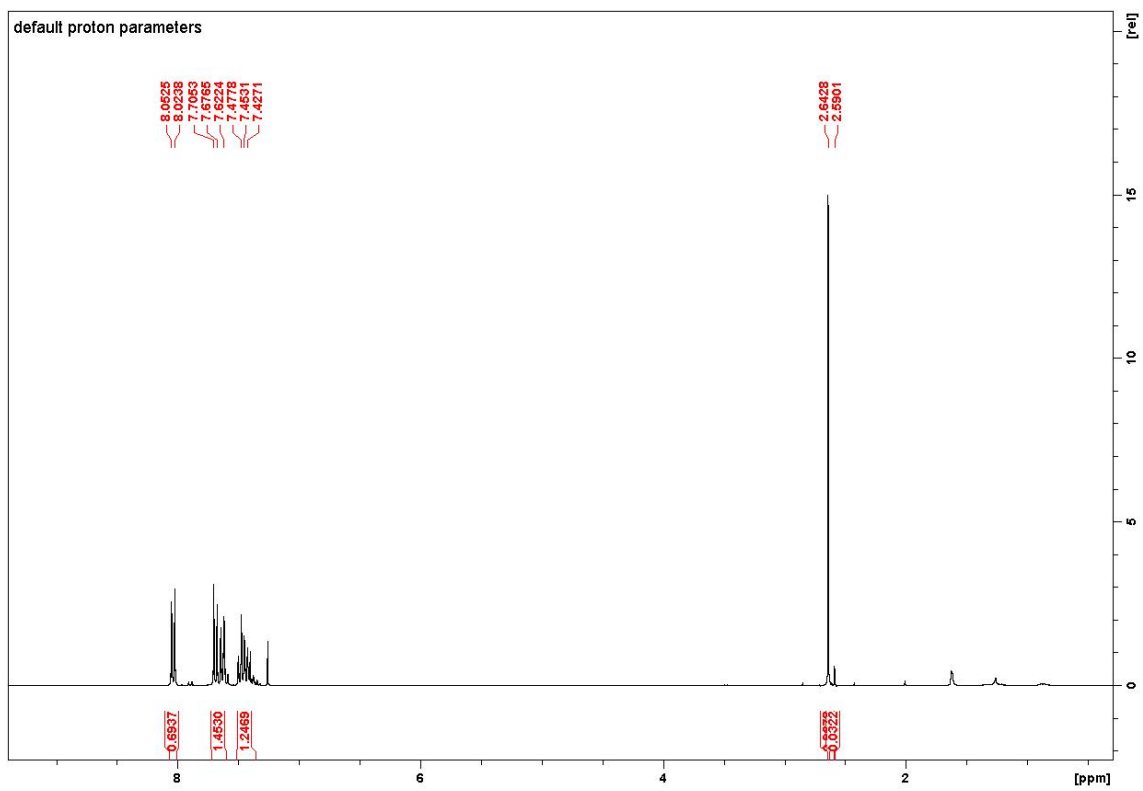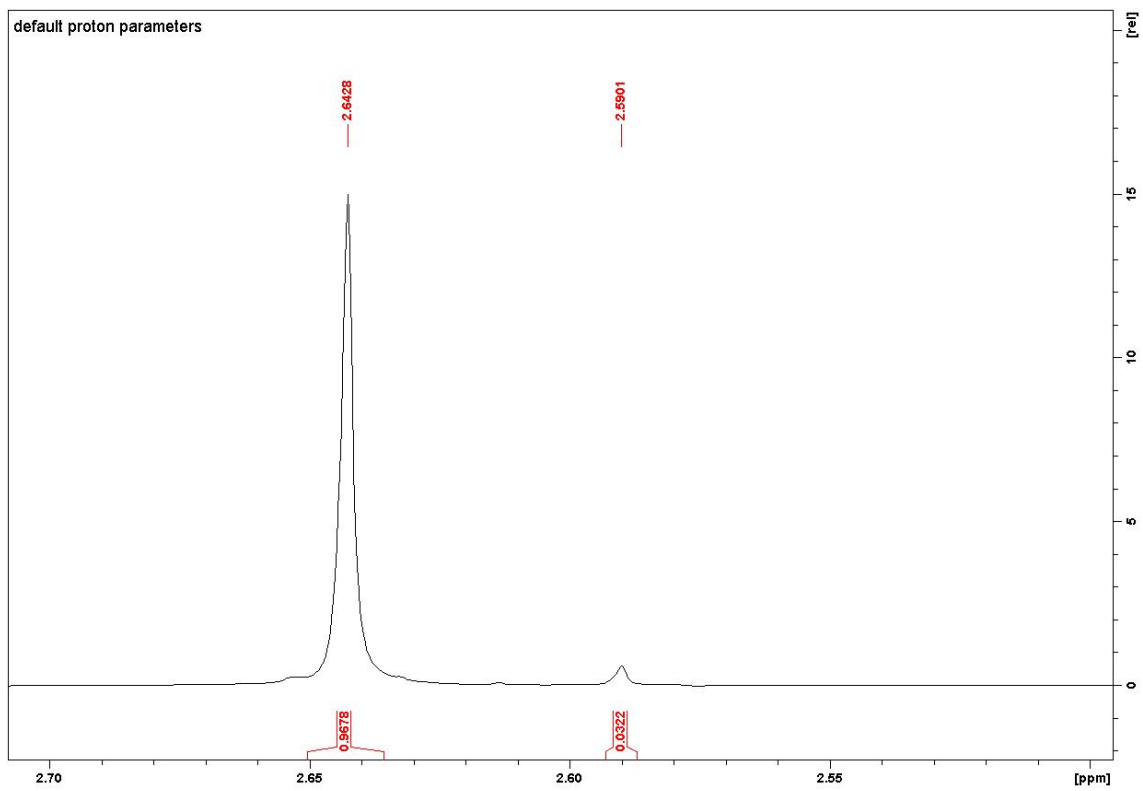

**Figure S14.**  $^1\text{H}$  NMR spectra (300 MHz,  $\text{CDCl}_3$ ) for the conversion of *p*-chloroacetophenone with two-month old Pd/PANI composite.

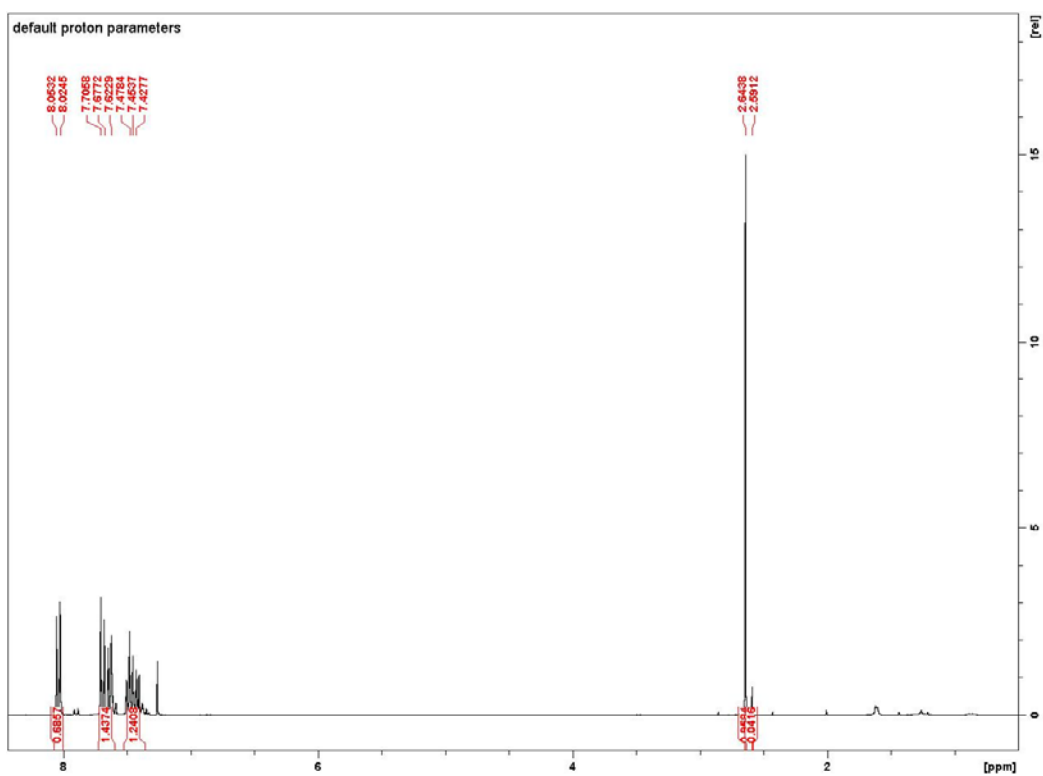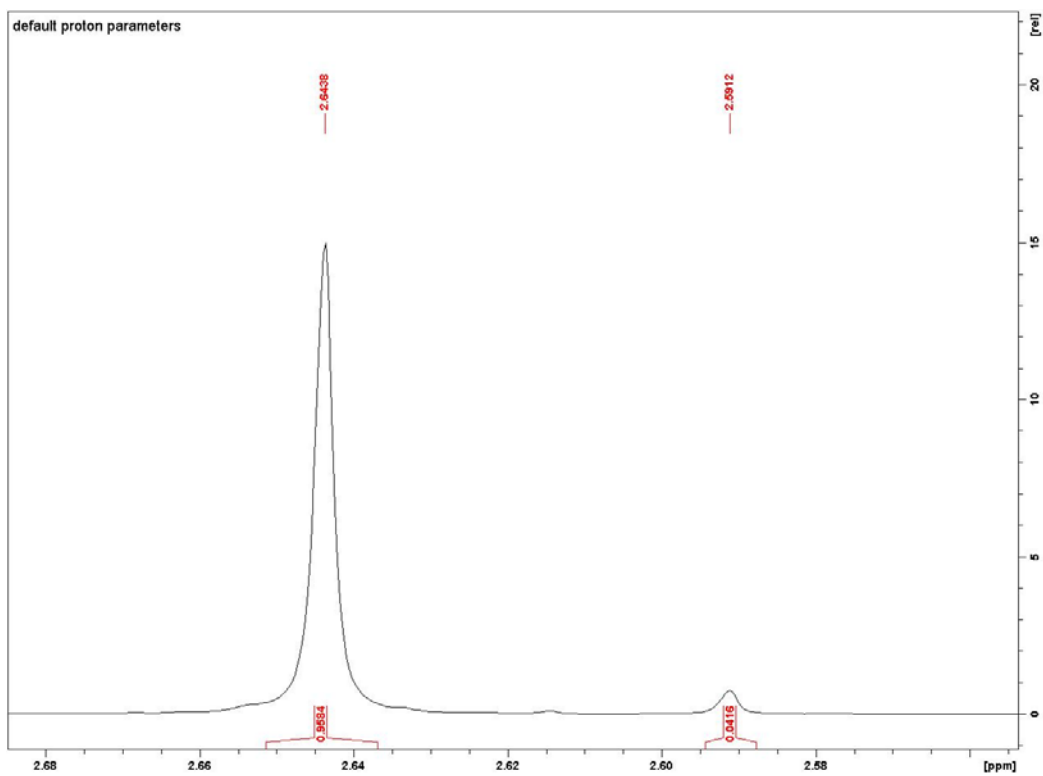

**Figure S15.**  $^1\text{H}$  NMR spectra (300 MHz,  $\text{CDCl}_3$ ) for the conversion of *p*-chloroacetophenone after the first attempt at recycling.

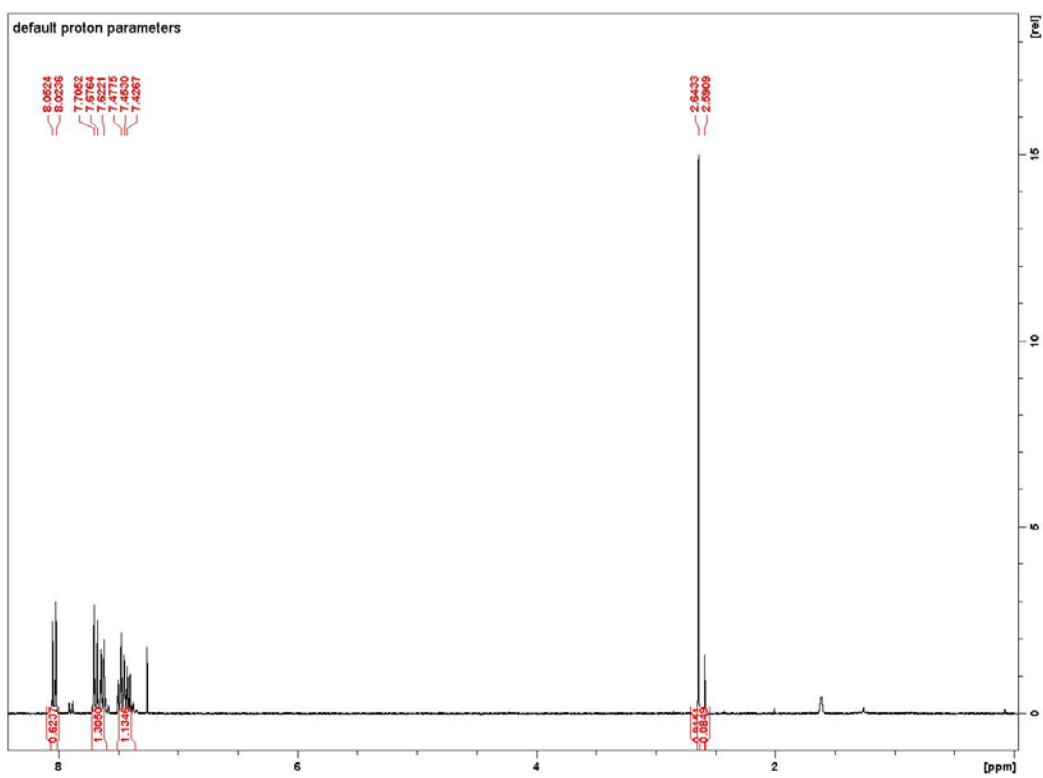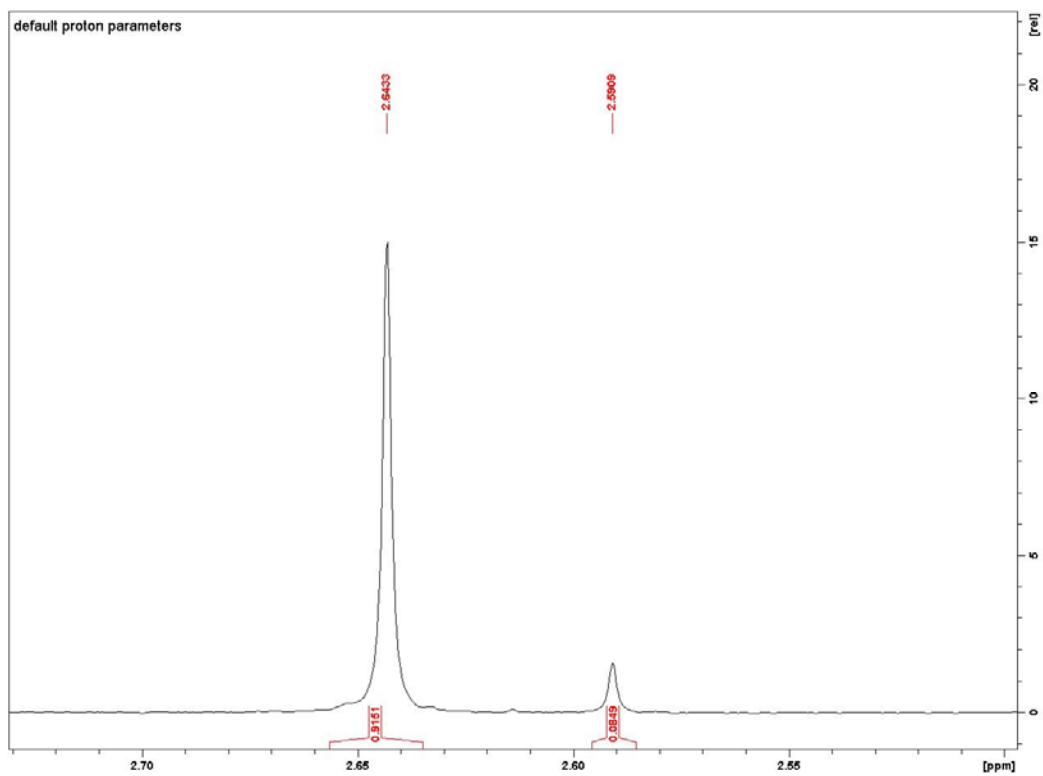

**Figure S16.**  $^1\text{H}$  NMR spectra (300 MHz,  $\text{CDCl}_3$ ) for the conversion of *p*-chloroacetophenone after the second attempt at recycling.



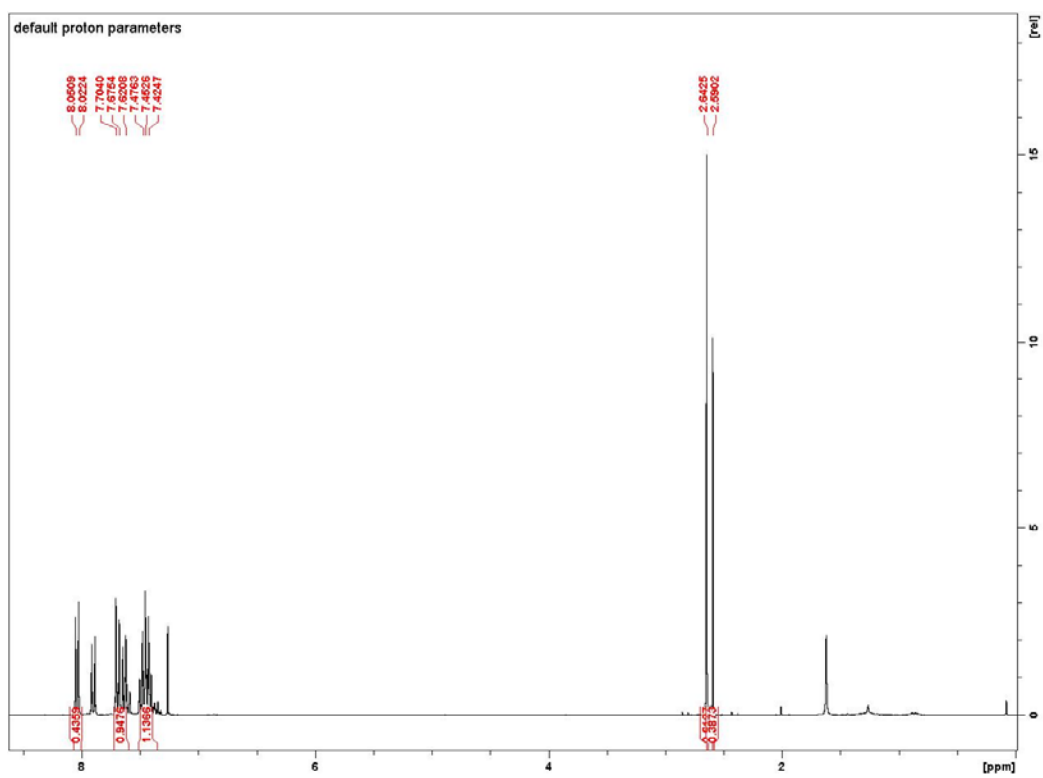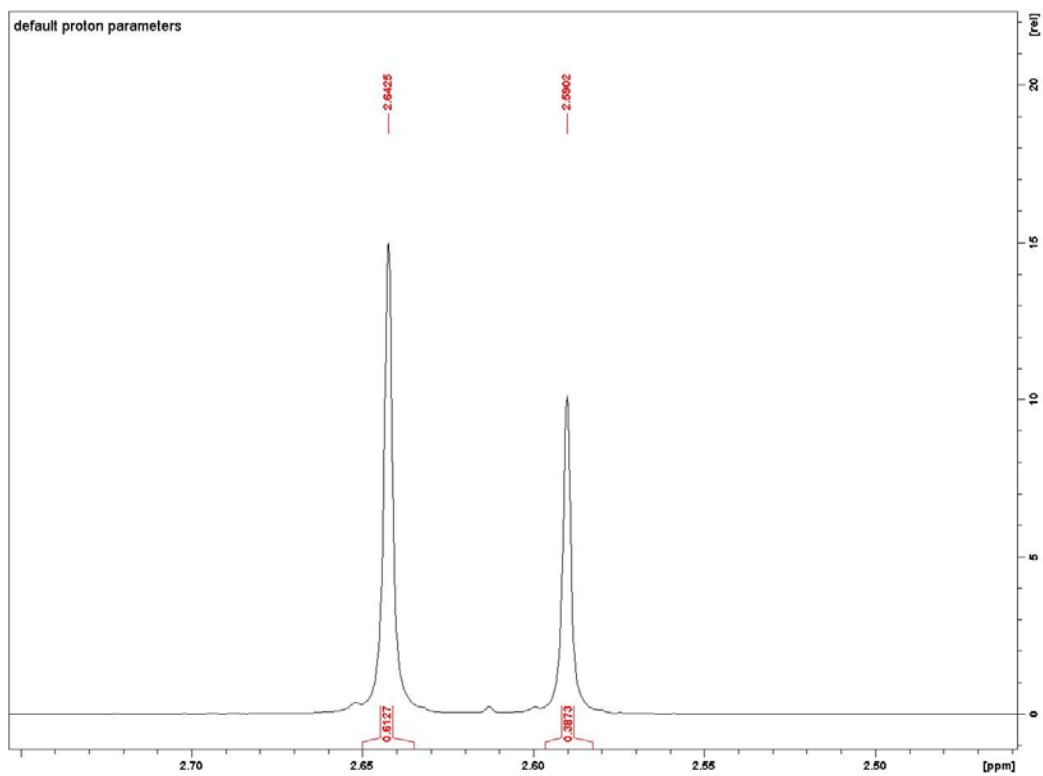

**Figure S17.**  $^1\text{H}$  NMR spectra (300 MHz,  $\text{CDCl}_3$ ) for the conversion of *p*-chloroacetophenone after the third attempt at recycling.

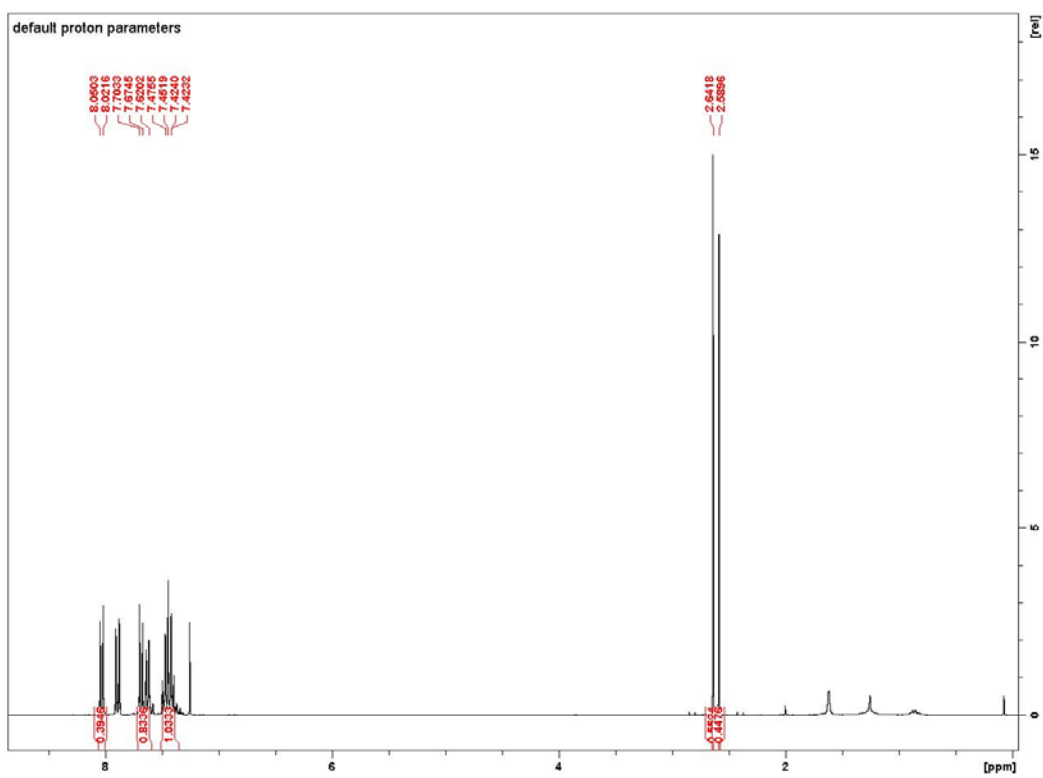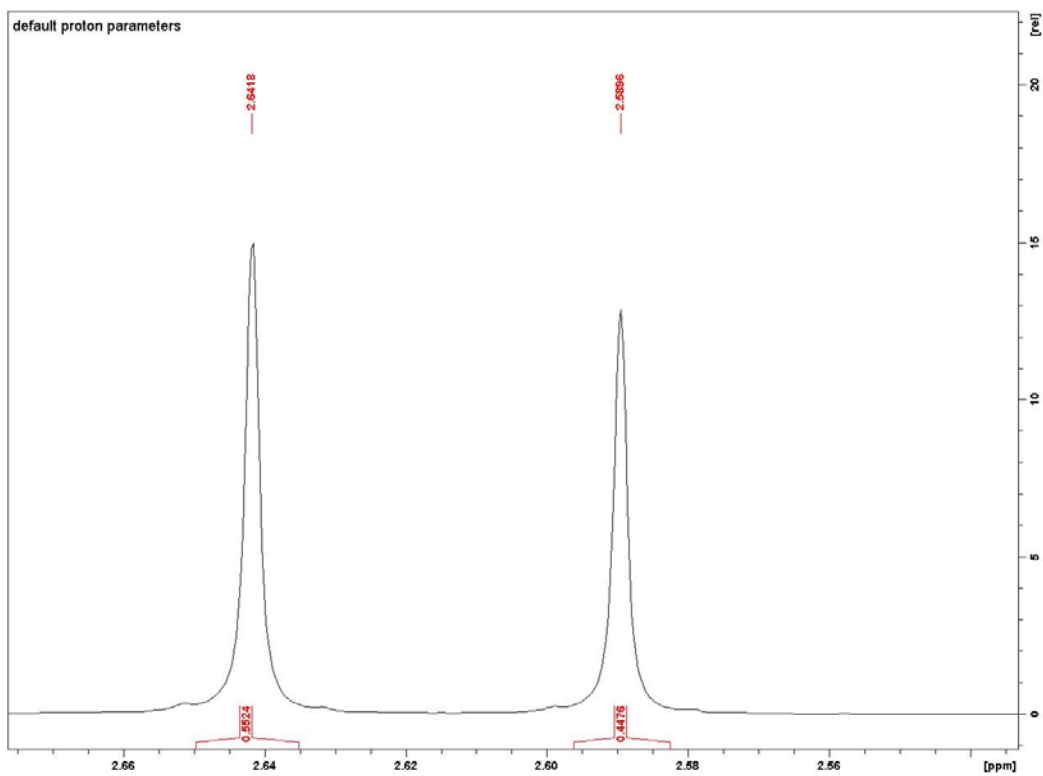

**Figure S18.**  $^1\text{H}$  NMR spectra (300 MHz,  $\text{CDCl}_3$ ) for the conversion of *p*-chloroacetophenone after the fourth attempt at recycling.

**Table S1.** Monitoring the reaction of 4-acetylbiphenyl over time

| <b>4-acetylbiphenyl conversion</b> |                |
|------------------------------------|----------------|
| Time (h)                           | Conversion (%) |
| 2                                  | 86             |
| 3                                  | 92             |
| 4                                  | 98             |

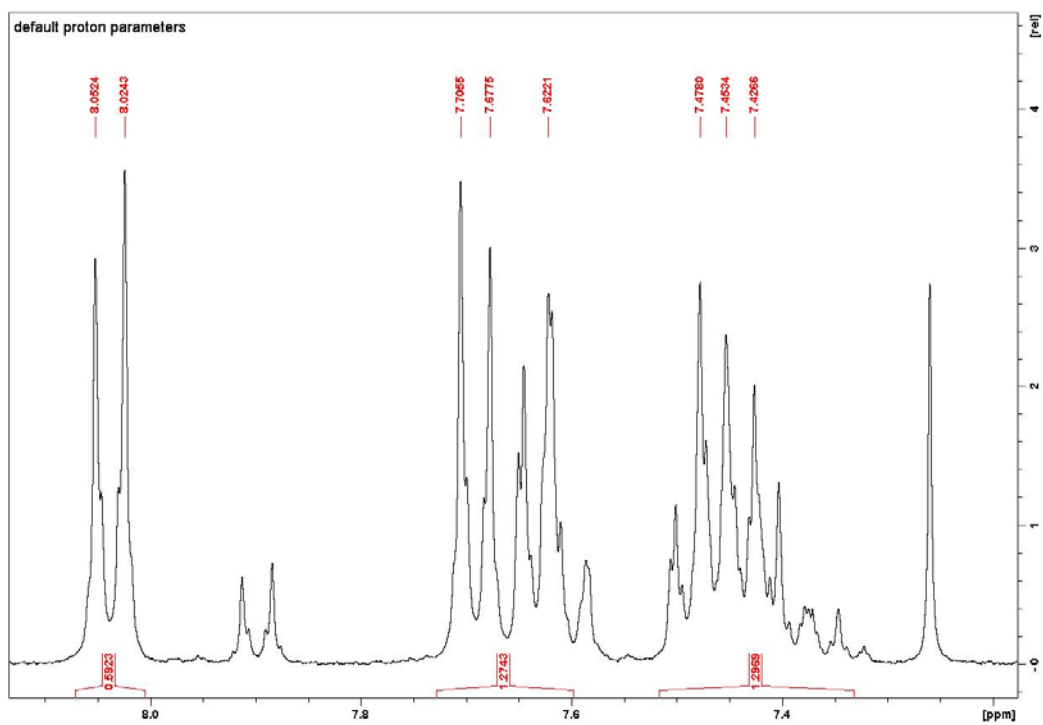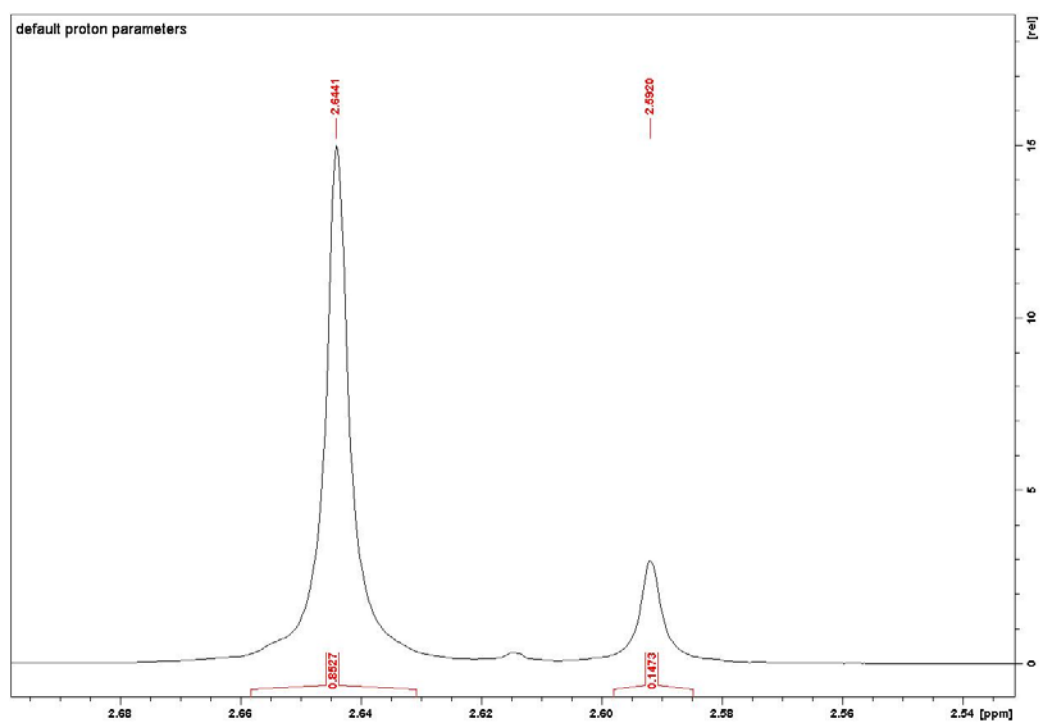

**Figure S19.**  $^1\text{H}$  NMR spectra (300 MHz,  $\text{CDCl}_3$ ) for the conversion of *p*-chloroacetophenone after 2 h.

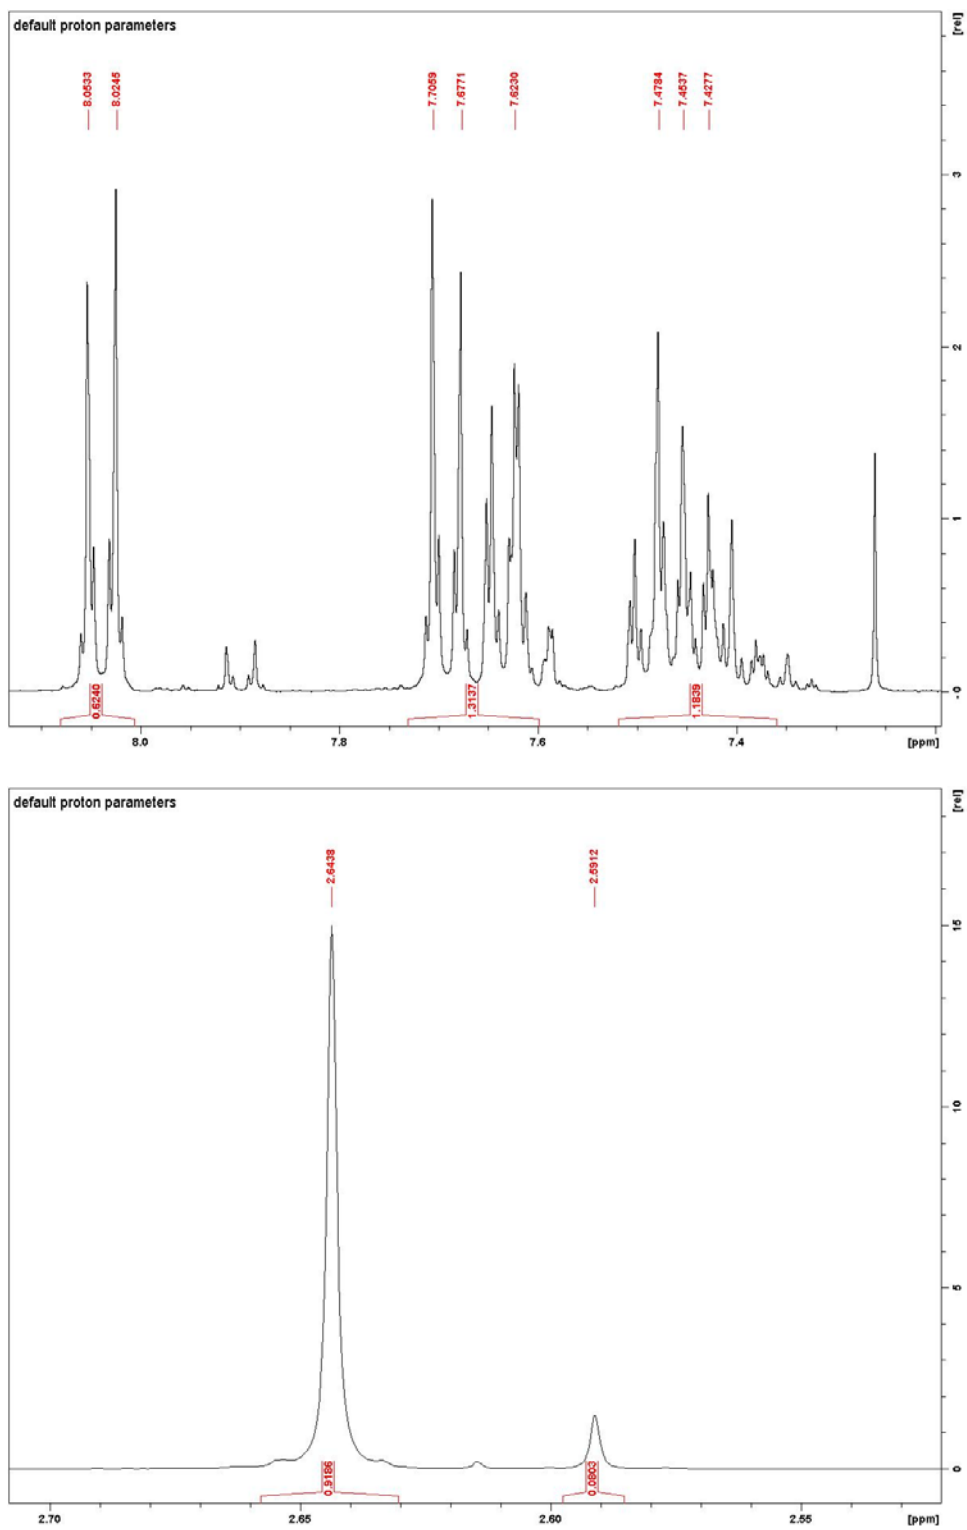

**Figure S20.** <sup>1</sup>H NMR spectra (300 MHz, CDCl<sub>3</sub>) for the conversion of *p*-chloroacetophenone after 3 h.

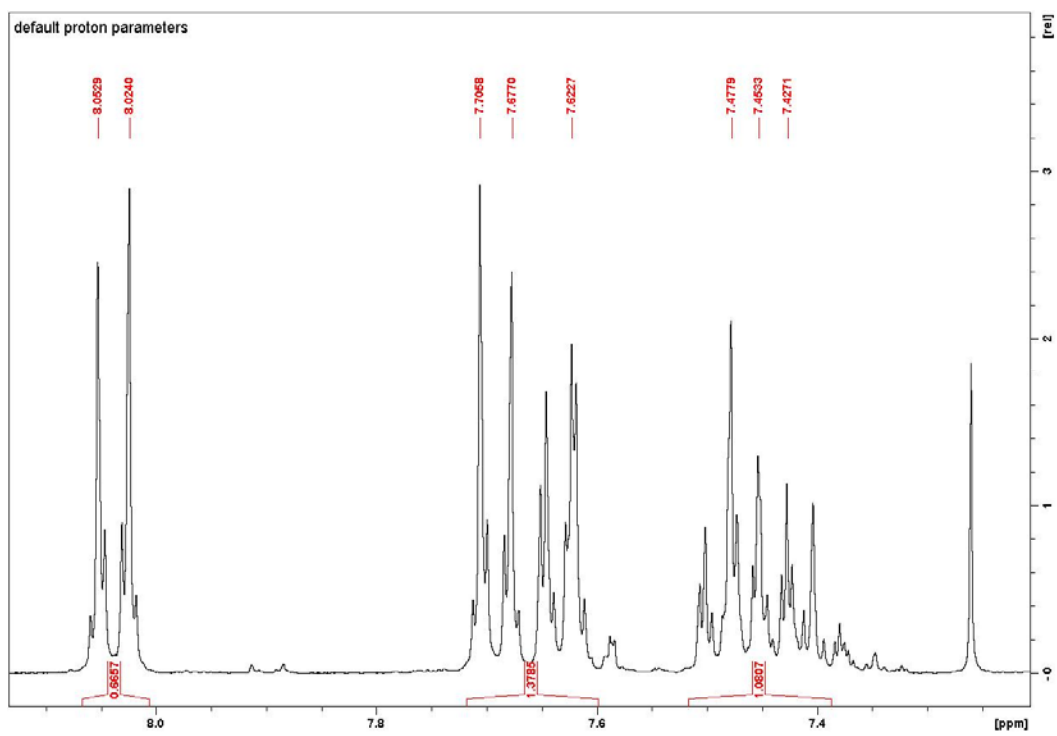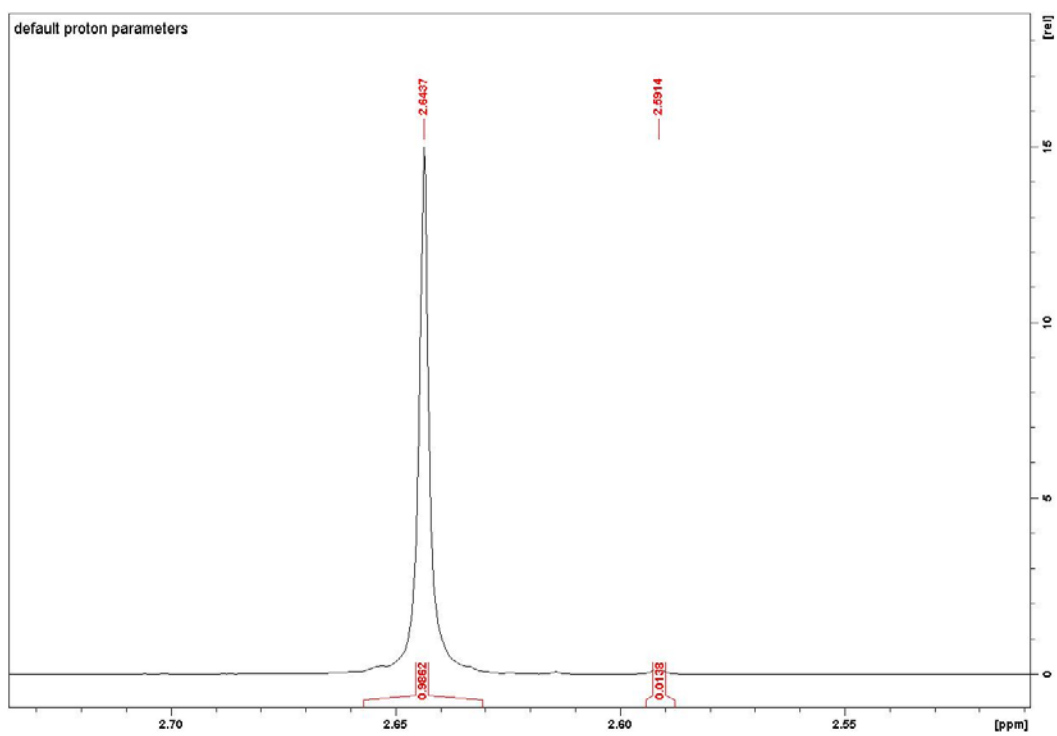

**Figure S21.**  $^1\text{H}$  NMR spectra (300 MHz,  $\text{CDCl}_3$ ) for the conversion of *p*-chloroacetophenone after 4 h.

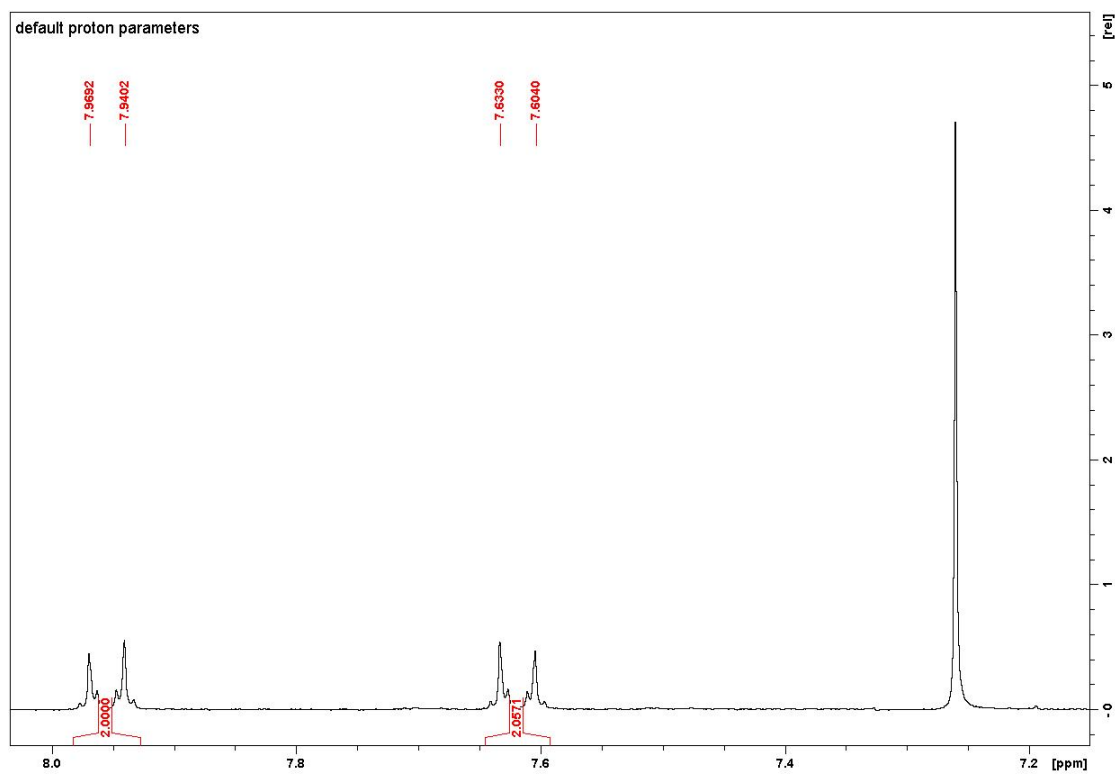

**Figure S22.**  $^1\text{H}$  NMR spectrum (300 MHz,  $\text{CDCl}_3$ ) of *p*-bromobenzoic acid.

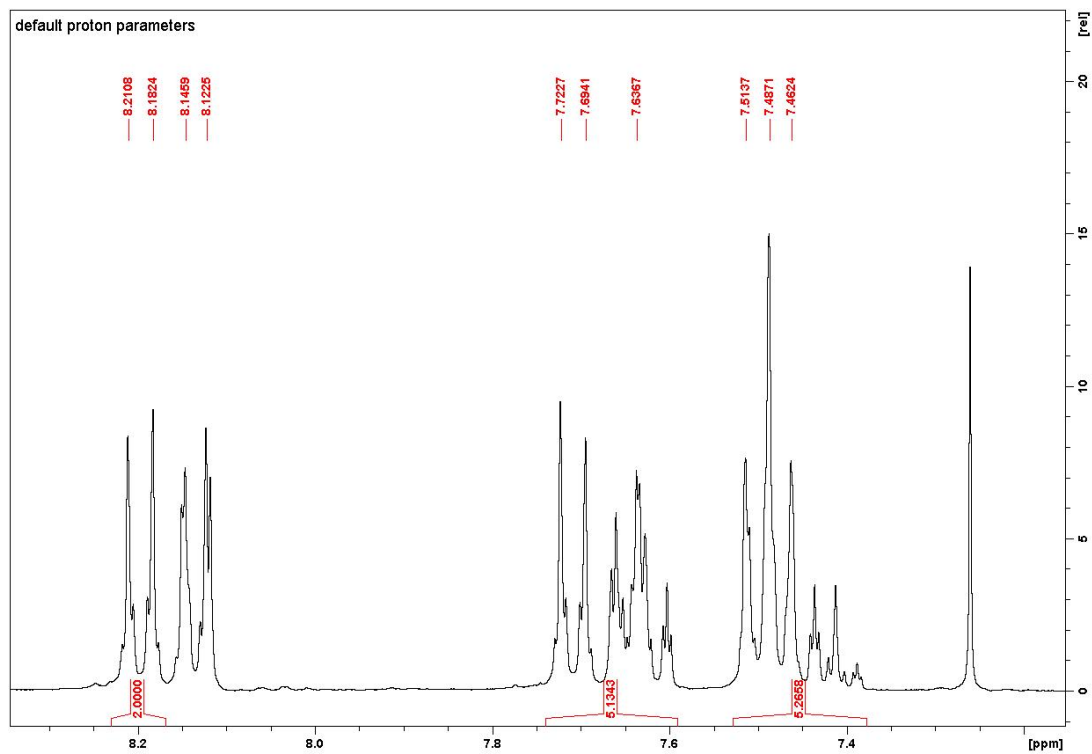

**Figure S23.**  $^1\text{H}$  NMR spectrum (300 MHz,  $\text{CDCl}_3$ ) of 4-biphenylbenzoic acid.

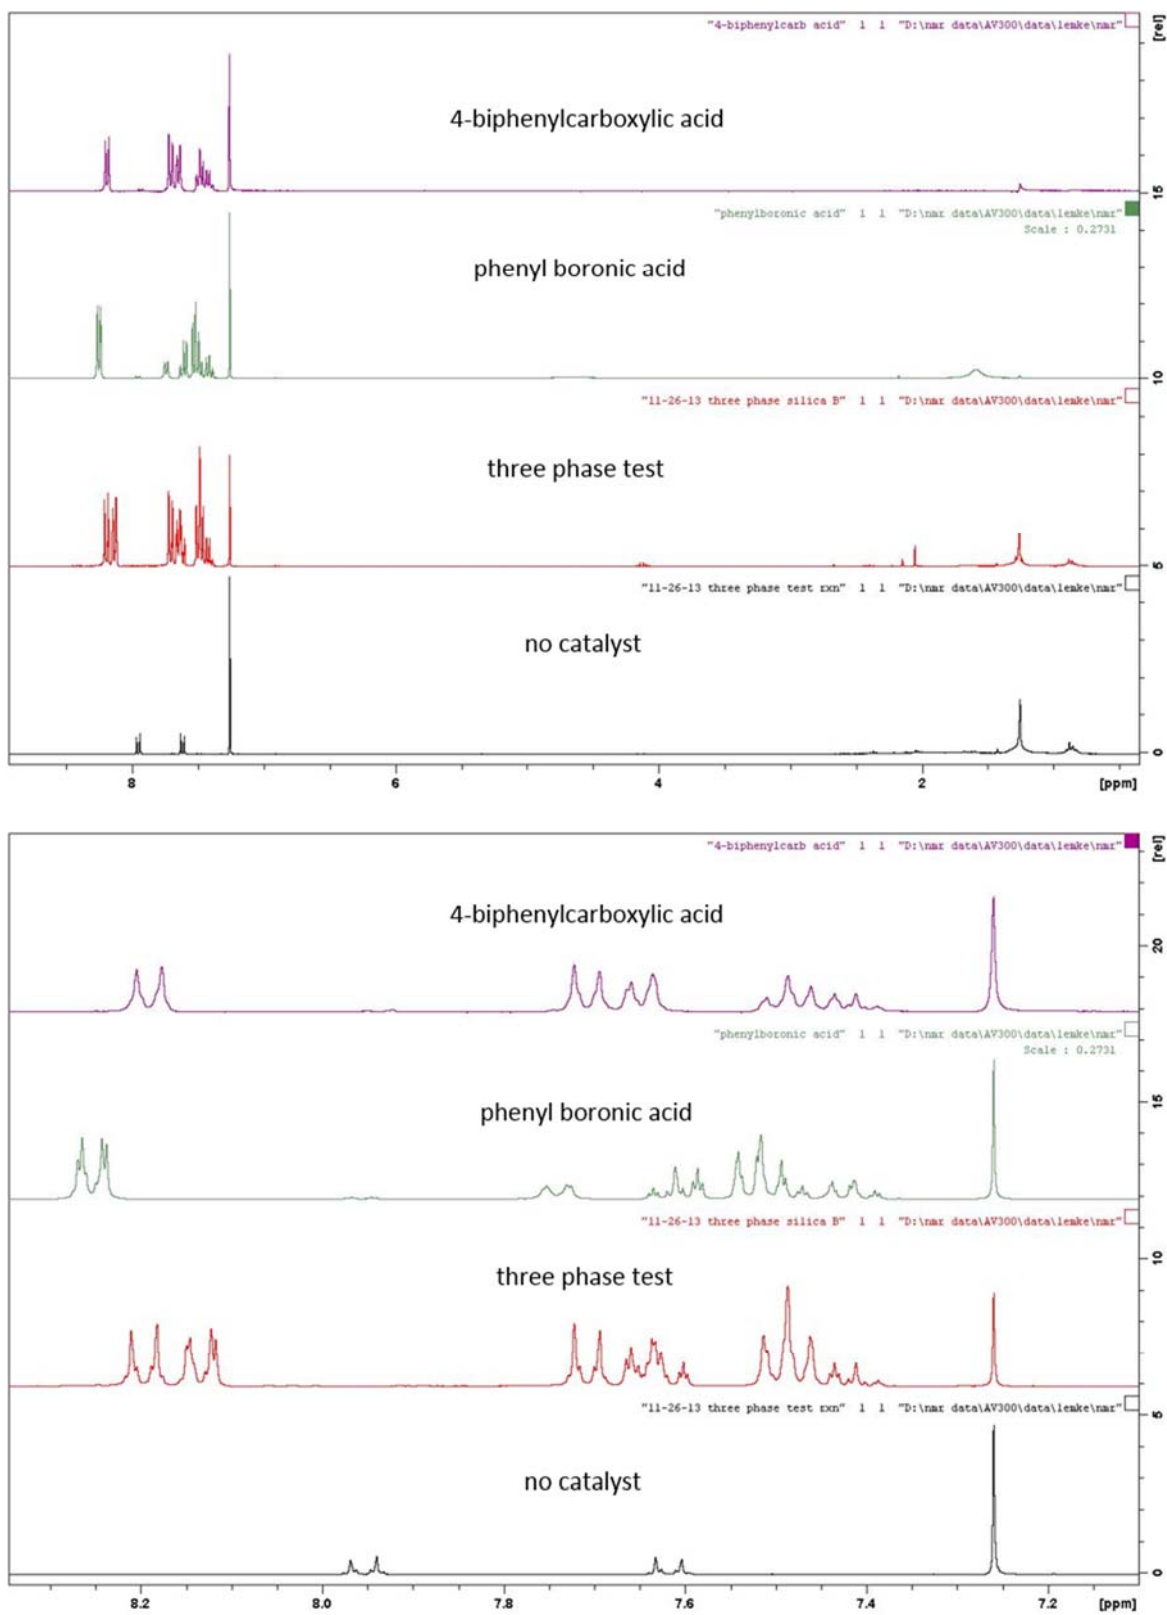

**Figure S24.** Comparison of  $^1\text{H}$  NMR spectra (300 MHz,  $\text{CDCl}_3$ ) for the three-phase test reaction.
